# Supplementary material for: Size-selective pH-operated megagates on mesoporous silica materials
Source: Royal Society of Chemistry journal article supplement (doi:10.1039/c2nr32170j), 2012-01-01
Supplement: c2nr32170j.pdf [file c2nr32170j.pdf]

# Size-Selective pH-Operated Megagates on Mesoporous Silica Materials

Min Xue<sup>†</sup>, Dennis Cao<sup>‡,§</sup>, J. Fraser Stoddart<sup>‡,§</sup> and Jeffrey I. Zink<sup>†,\*</sup>

<sup>†</sup> *Department of Chemistry and Biochemistry, University of California, Los Angeles, California 90095, United States.*

<sup>‡</sup> *Department of Chemistry, Northwestern University, 2145 Sheridan Road, Evanston, Illinois 60208, United States.*

<sup>§</sup> *NanoCentury KAIST Institute and Graduate School of EEWS (WCU), Korea Advanced Institute of Science and Technology (KAIST) 373-1, Guseong Dong, Yuseong Gu, Daejeon 305-701, Republic of Korea.*

## SUPPORTING INFORMATION

### Table of Contents

|            |                                                        |
|------------|--------------------------------------------------------|
| Section S1 | <sup>13</sup> C CP/MAS NMR Spectrum of modified SBA-15 |
| Section S2 | N <sub>2</sub> Absorption Isotherm of SBA-15           |

# S1. $^{13}\text{C}$ CP/MAS NMR Spectrum of modified SBA-15

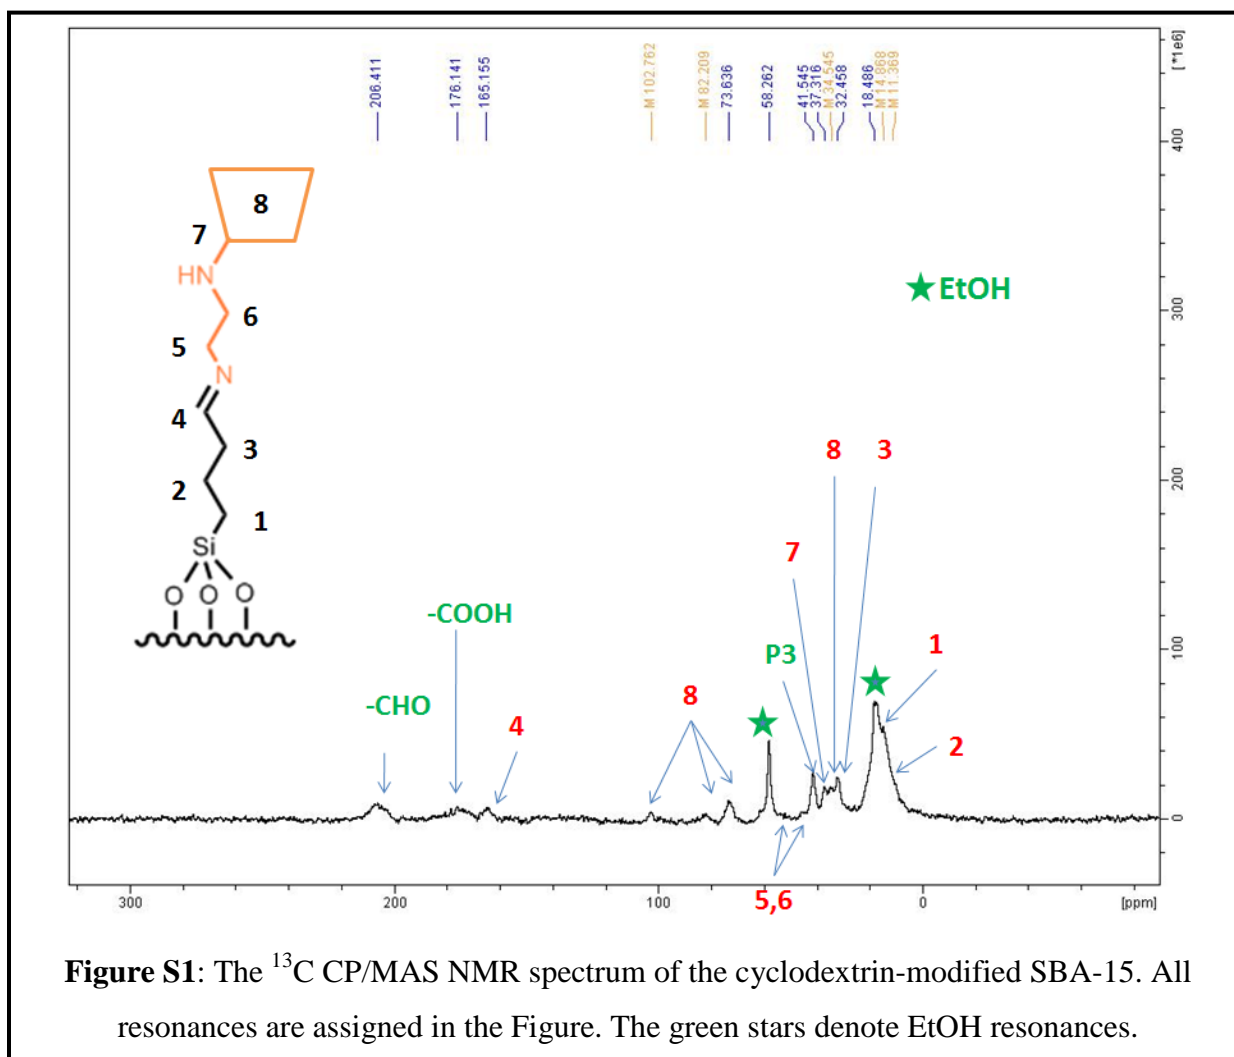

The  $^{13}\text{C}$  CP/MAS NMR spectrum of the cyclodextrin-modified SBA-15 confirms that imine formation between 6-(2-aminoethyl)amino-6-deoxy- $\beta$ -cyclodextrin and SBA-15 took place successfully. The resonances at ~210 ppm can be assigned to unreacted aldehyde residues. The resonances at ~180 ppm can be assigned to carboxylic acids that are a product of the oxidation of the unreacted aldehydes. The proton  $\alpha$  to the unreacted aldehyde, P3, resonates at ~40 ppm.

## S2. N<sub>2</sub> Adsorption Isotherm of SBA-15

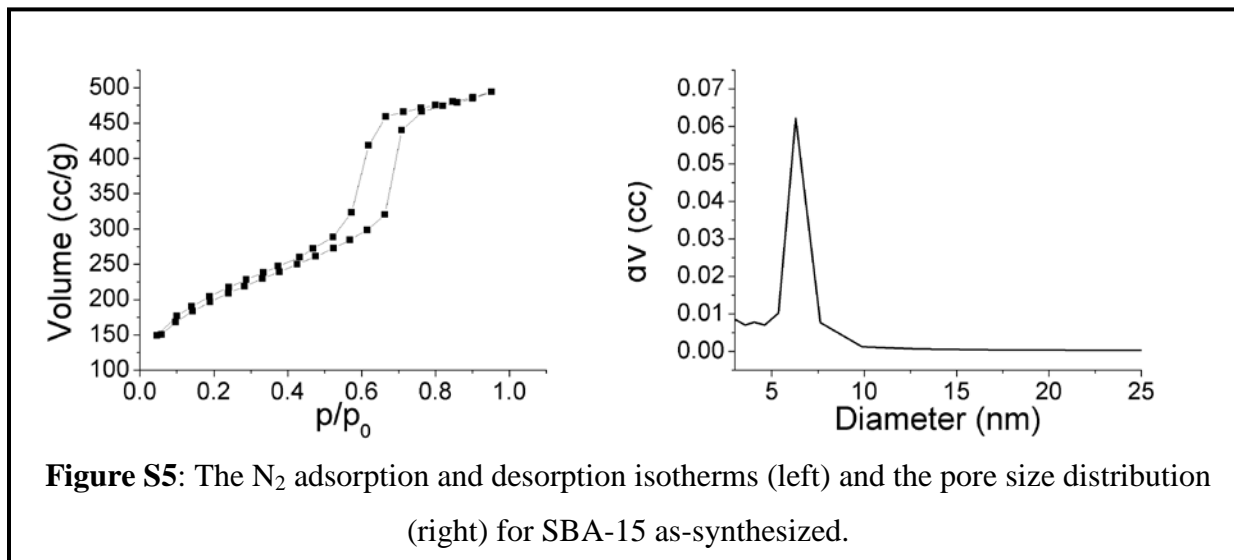

The distribution of pore sizes was determined from N<sub>2</sub> adsorption-desorption experiments. The relatively uniform pore sizes ensure that the majority of the pores are functional and able to uptake the large dextran cargo molecules.
